# Supplementary material for: TRIM59 promotes steatosis and ferroptosis in non-alcoholic fatty liver disease via enhancing GPX4 ubiquitination
Source: PubMed Central journal article supplement (PMC9813033; doi:10.1007/s13577-022-00820-3), 2022-11-22
Supplement: 13577_2022_820_MOESM2_ESM.pdf [file 13577_2022_820_MOESM2_ESM.pdf]

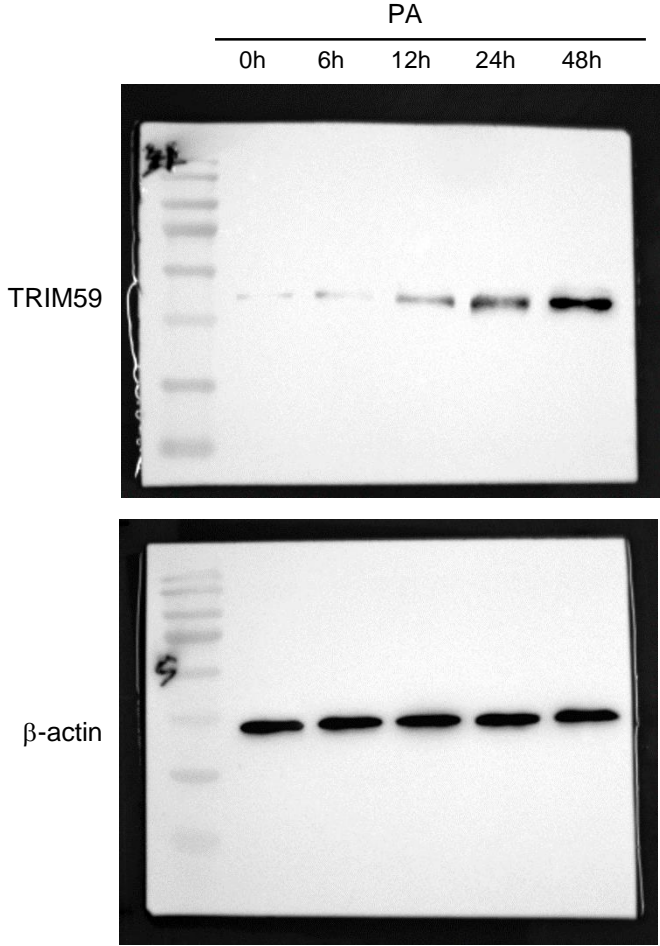

Fig. 2A

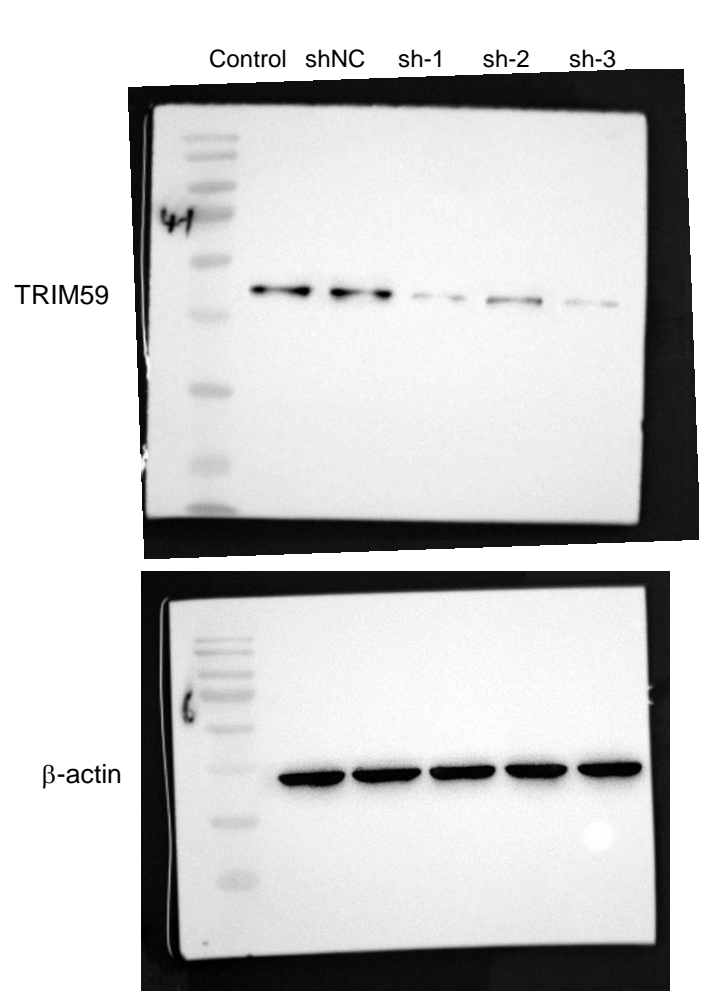

Fig. 2B

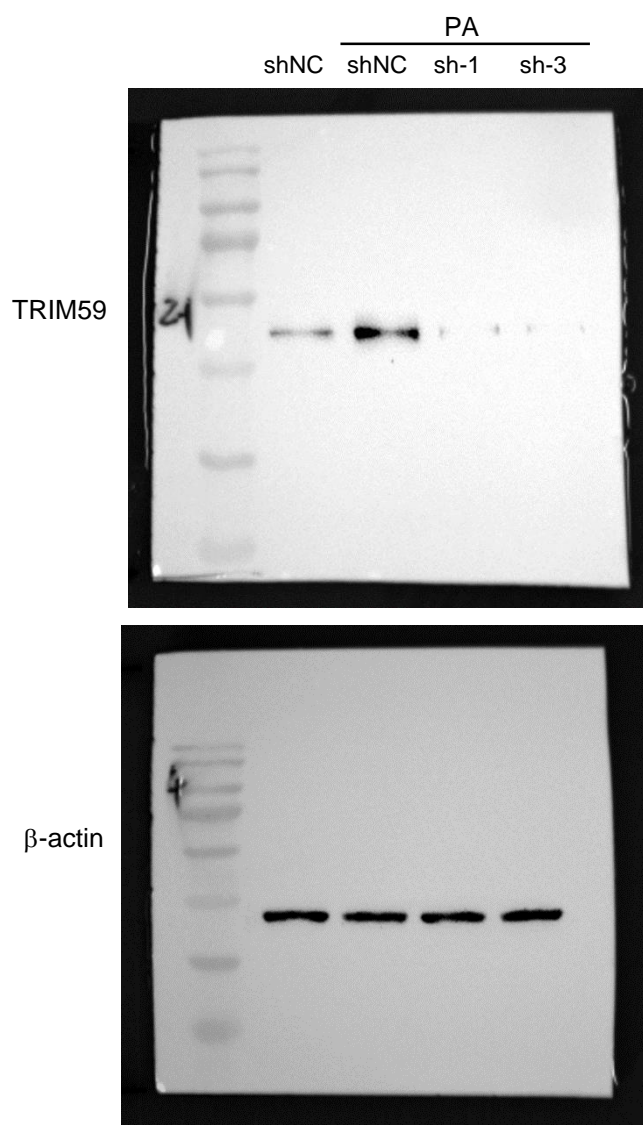

Fig. 2C

Control Vector oeTRIM59

TRIM59

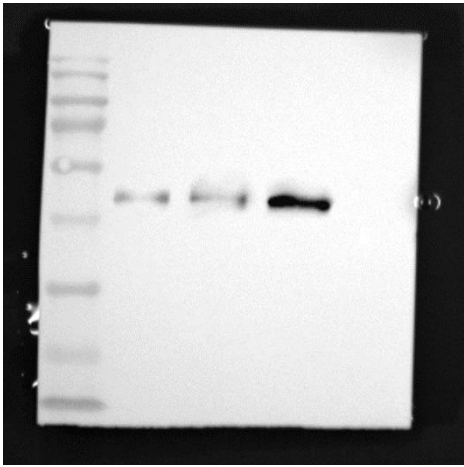

PA  
Vector Vector oeTRIM59

TRIM59

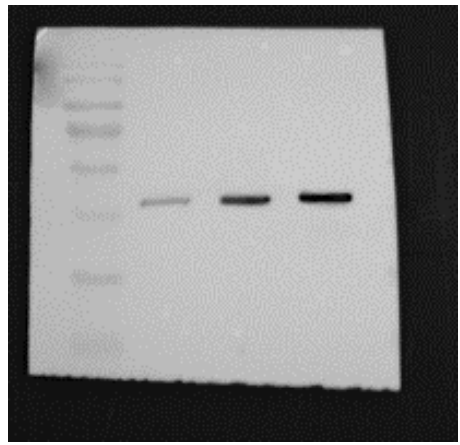

$\beta$ -actin

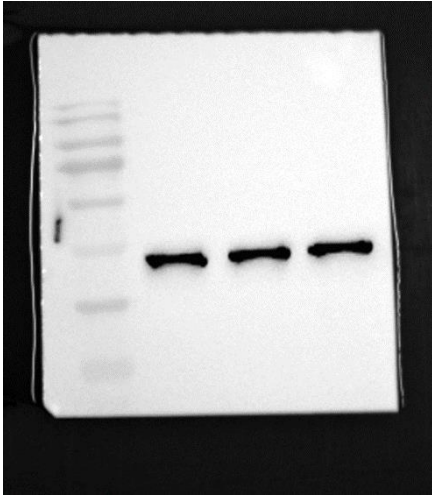

Fig. 3A

$\beta$ -actin

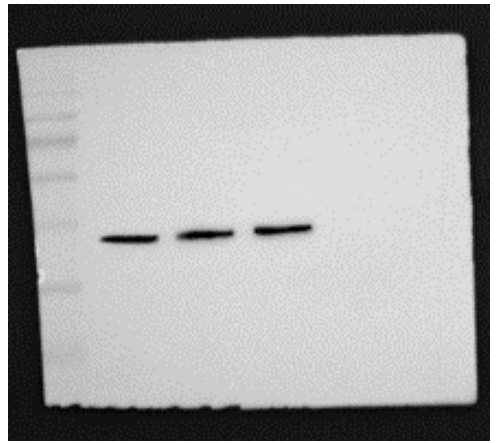

Fig. 3B

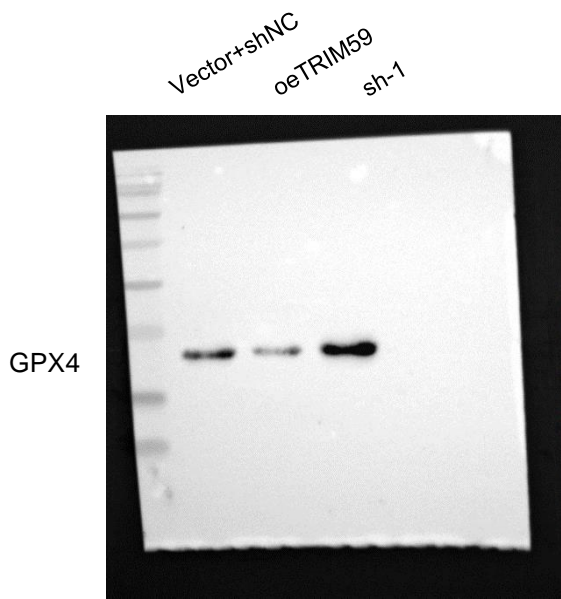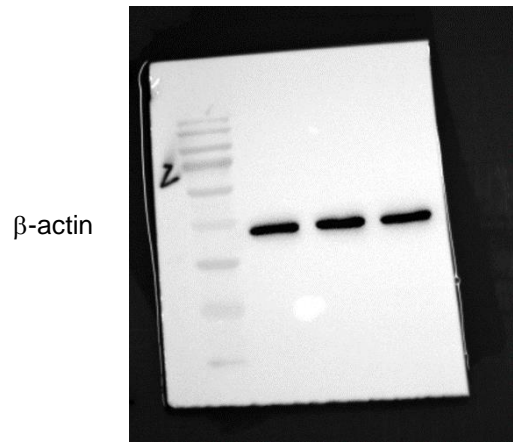

Fig. 5A

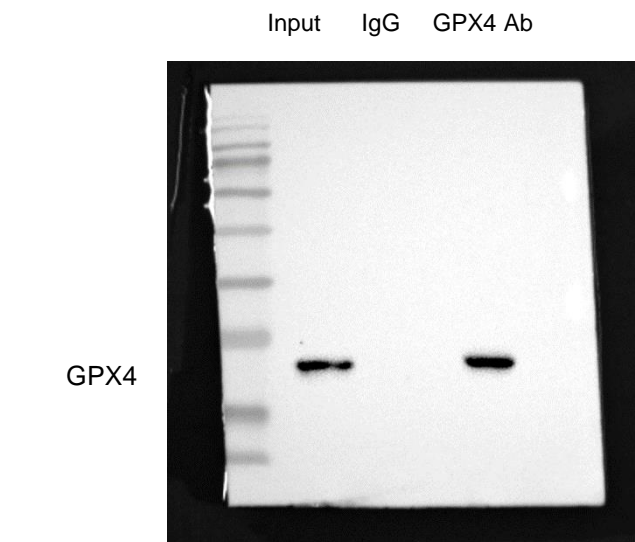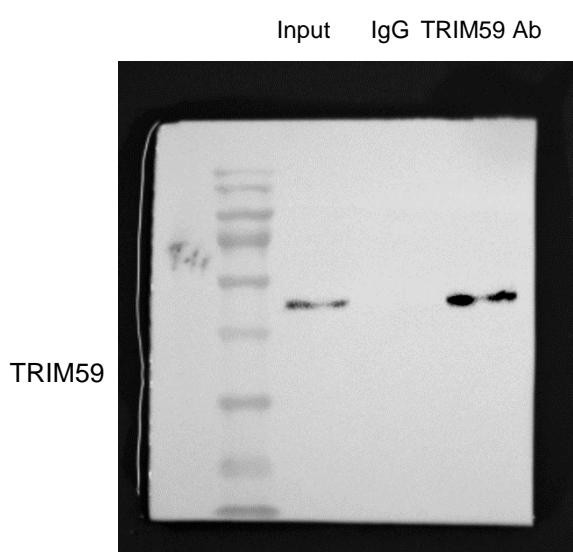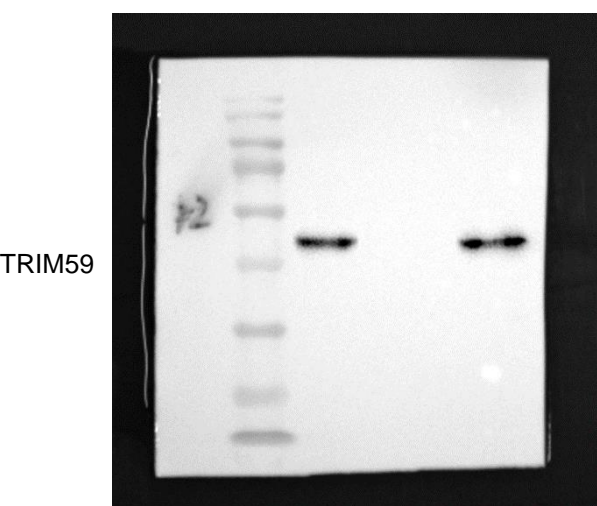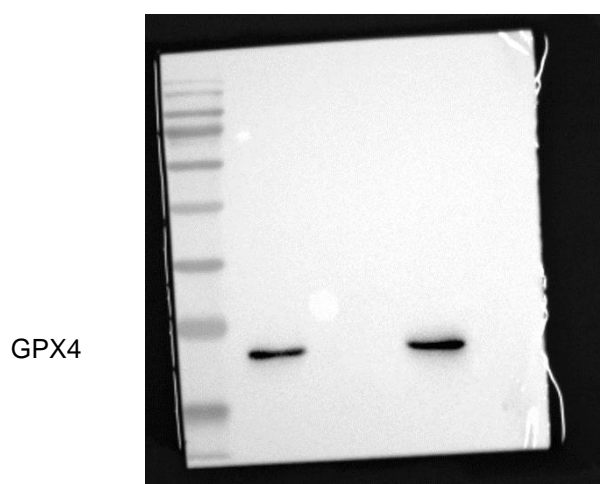

Fig. 5C

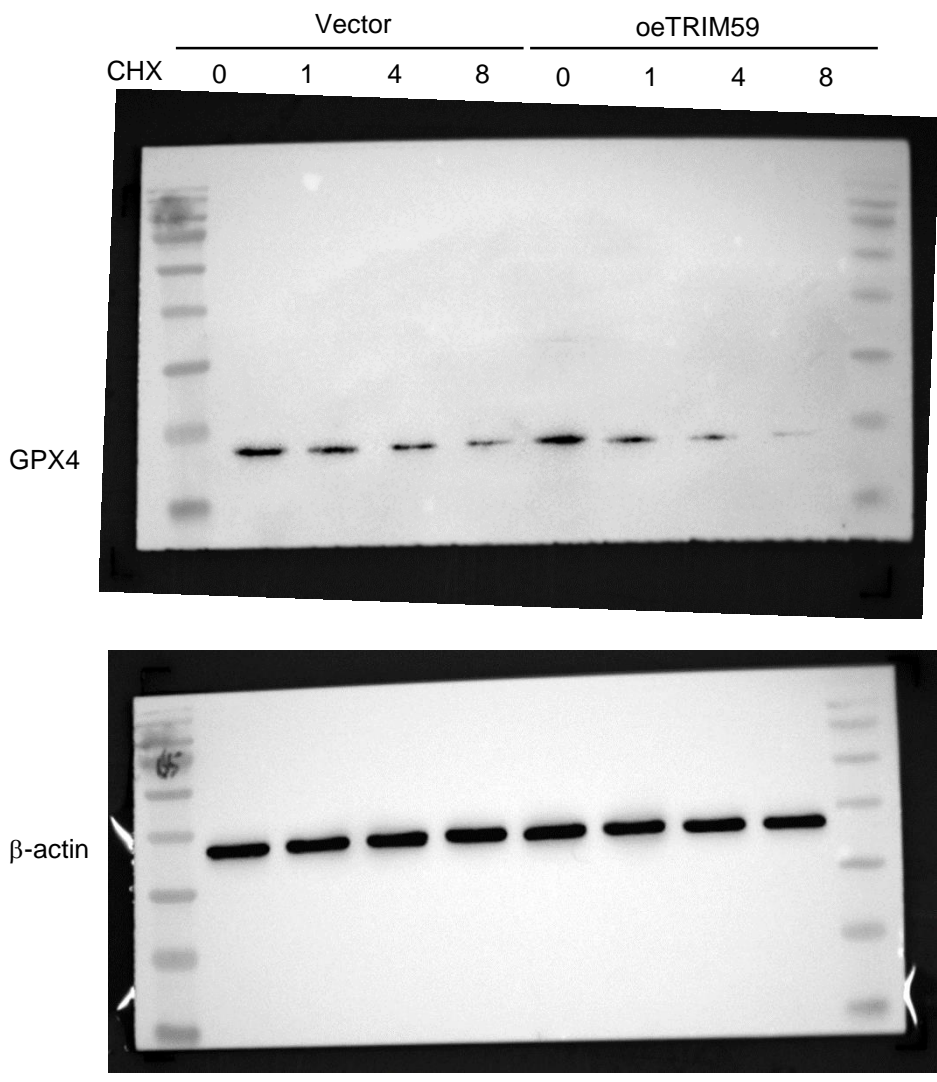

Fig. 5D

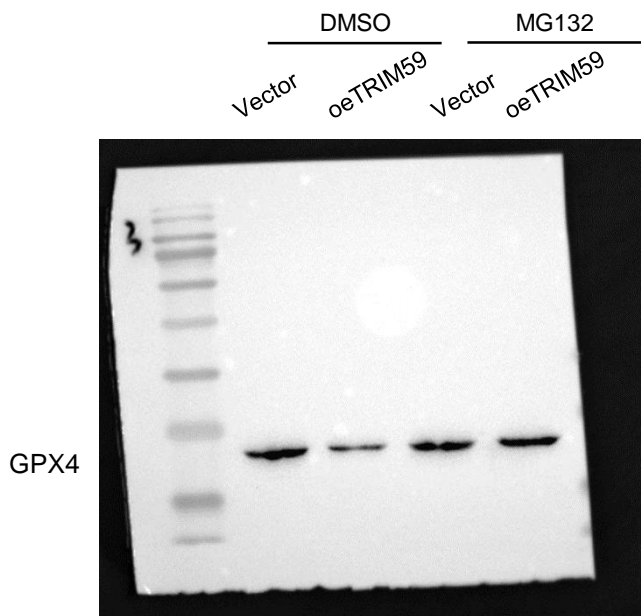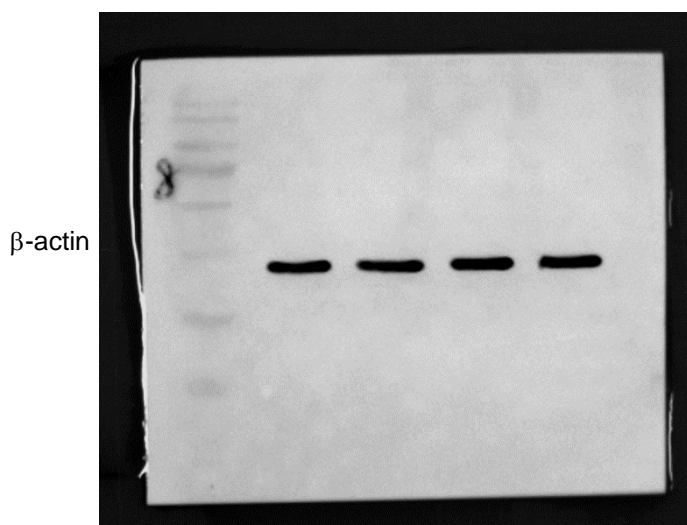

Fig. 5E

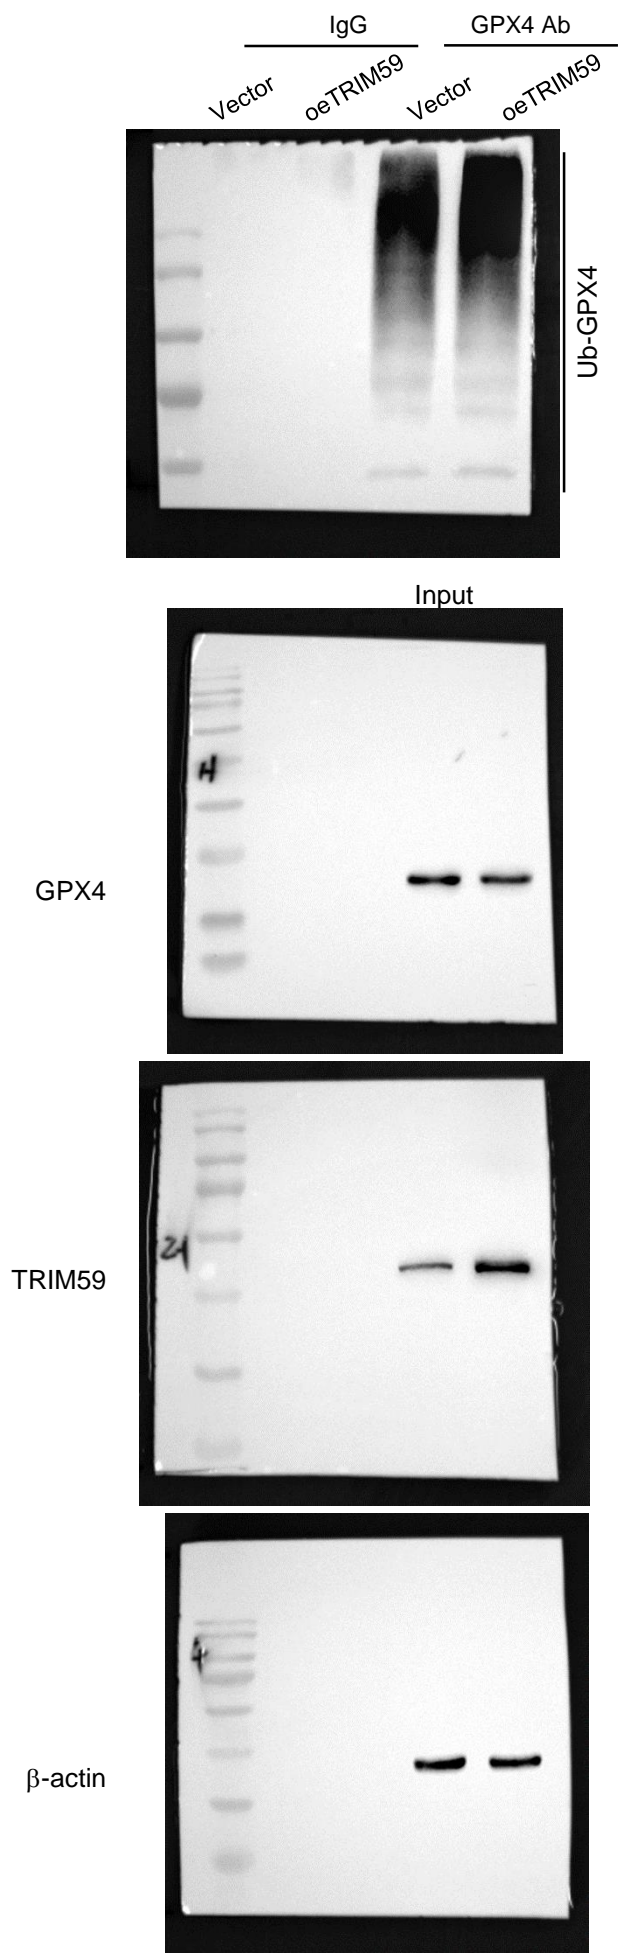

Fig. 5F



Control Vector oeGPX4

GPX4

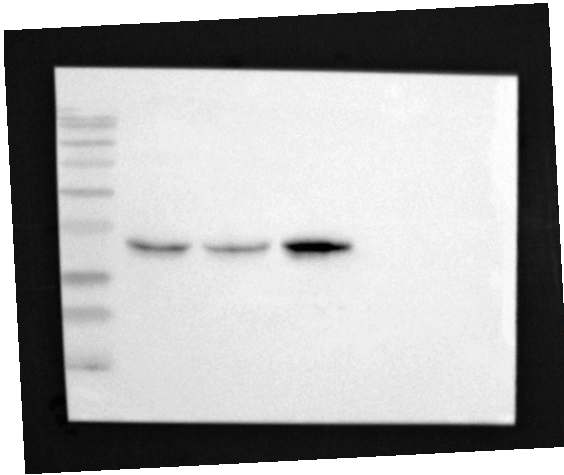

$\beta$ -actin

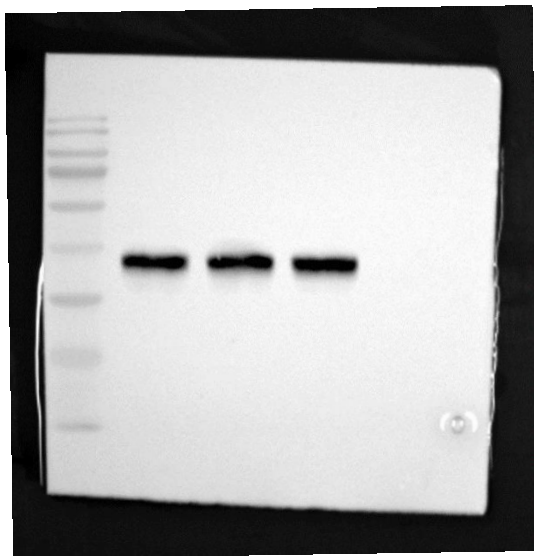

Fig. 6A

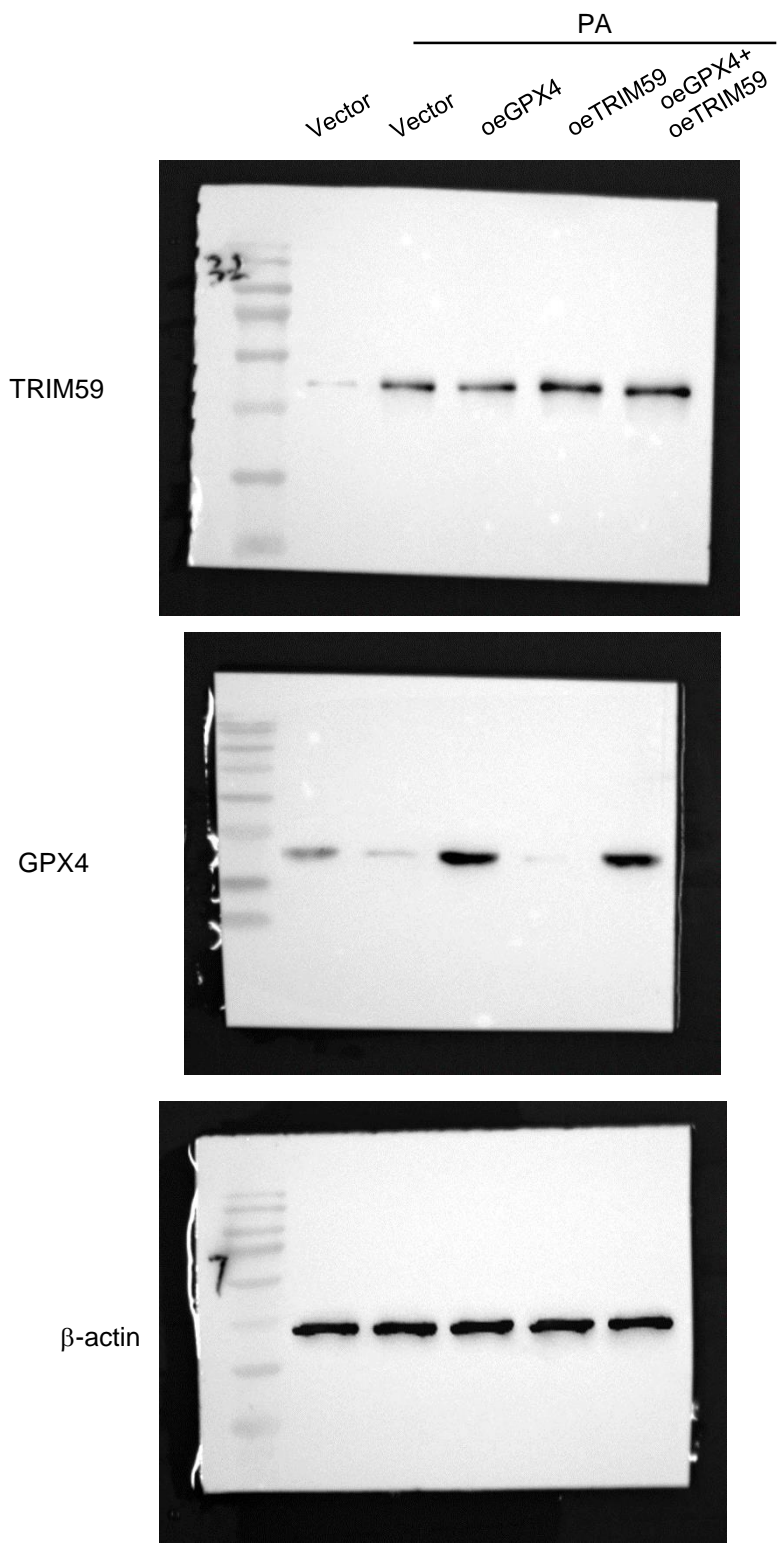

Fig. 6B

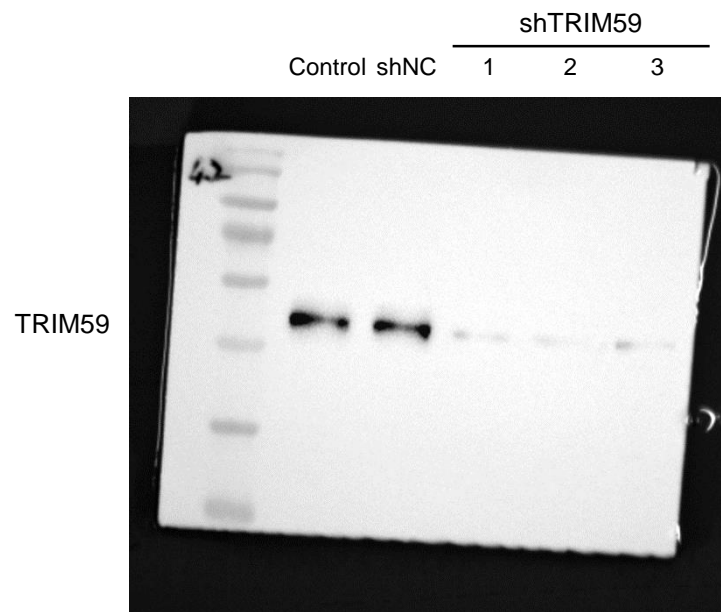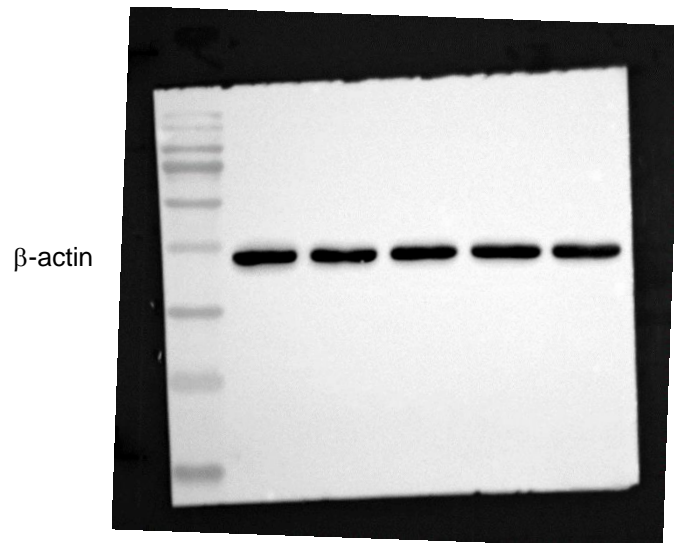

Fig. 7A

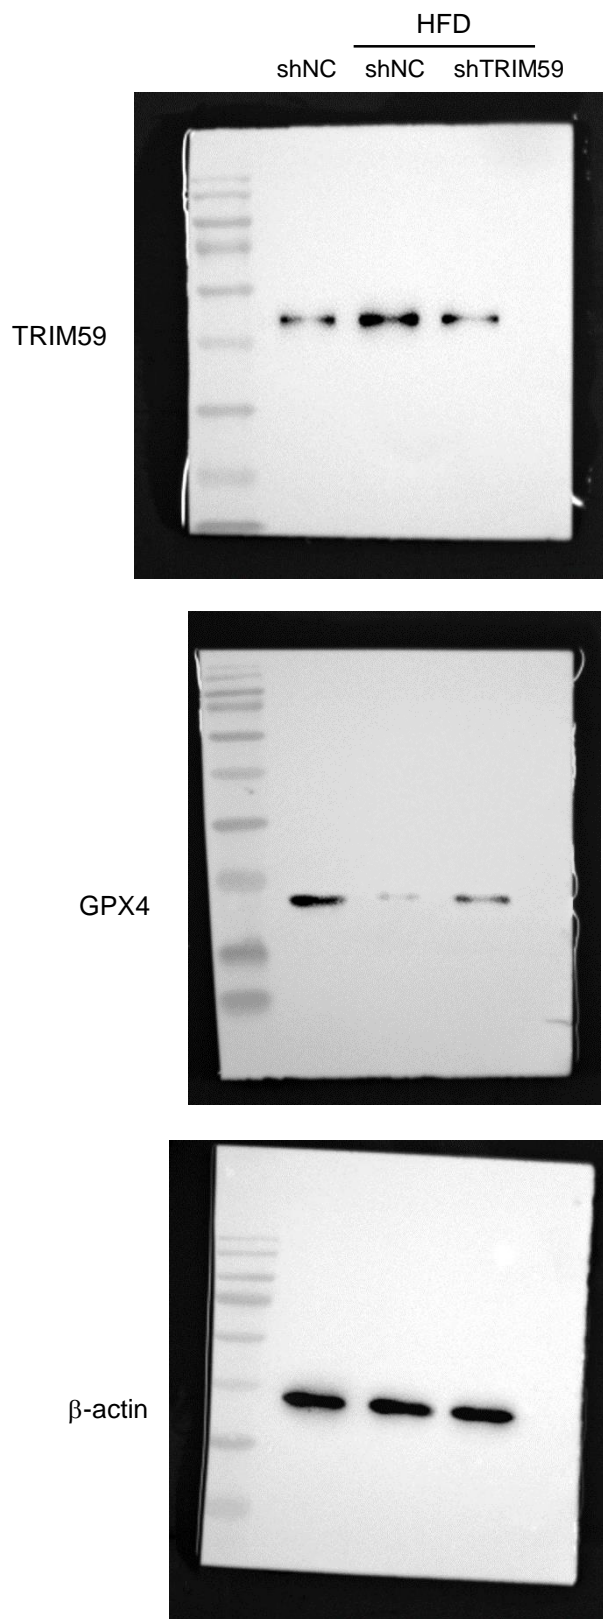

Fig. 7B
